# Supplementary material for: Estimation of CH 4 emission based on an advanced 4D-LETKF assimilation system
Source: Copernicus journal article supplement (doi:10.5194/gmd-16-1823-2023), 2023-03-31
Supplement: Supplementary file 1 [file gmd-16-1823-2023-supplement.pdf]

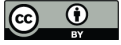

*Supplement of*

## **Estimation of CH<sub>4</sub> emission based on an advanced 4D-LETKF assimilation system**

**Jagat S. H. Bisht et al.**

*Correspondence to:* Jagat S. H. Bisht ([jagatbisht@jamstec.go.jp](mailto:jagatbisht@jamstec.go.jp), [jshbisht@gmail.com](mailto:jshbisht@gmail.com))

The copyright of individual parts of the supplement might differ from the article licence.

1

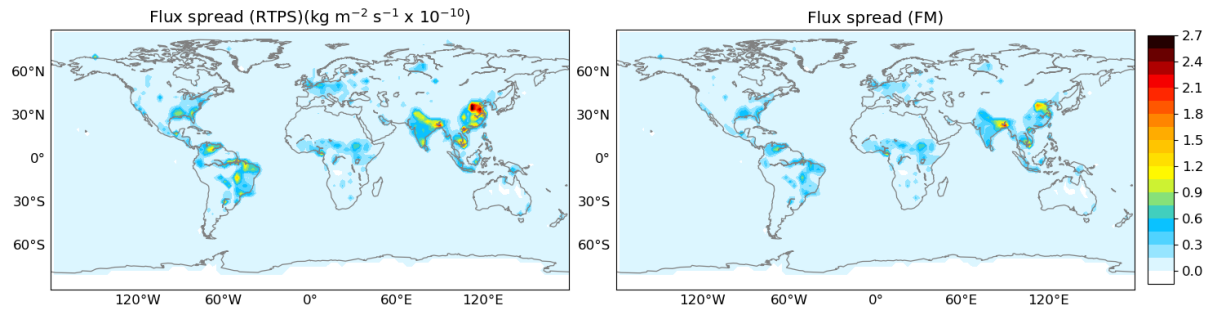

2

3 **Figure S1.** Initial analysis ensemble flux spread with RTPS and fixed multiplicative (FM) covariance  
4 inflation methods.

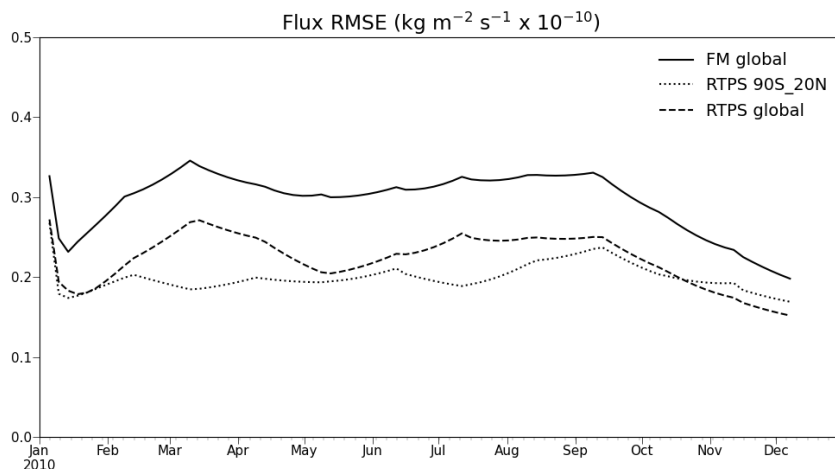

5

6 **Figure S2.** Time series of RMSE of surface CH<sub>4</sub> flux analysis, for 1 year of data assimilation at every  
7 grid using fixed multiplicative inflation and RTPS inflation methods over global landmass region.

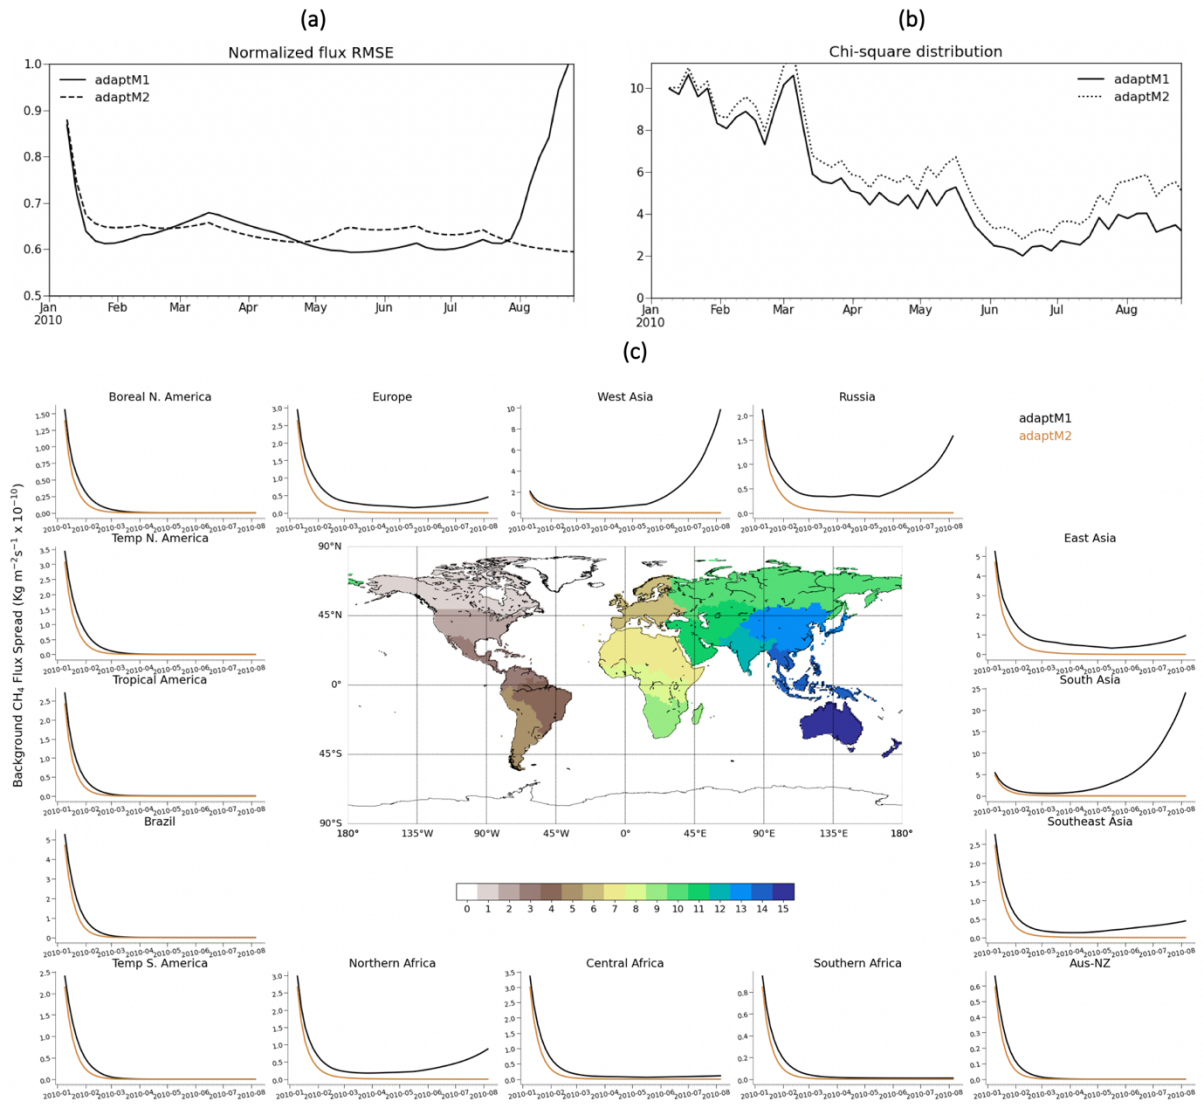

8

9 **Figure S3** CH<sub>4</sub> LETKF flux estimation time series for; (a) normalized RMSE estimated using  
 10 adaptive multiplicative inflation method in two sensitivity experiments (adaptM1; 50% initial  
 11 inflation, adaptM2; 40% initial inflation), (b) chi-square distribution comparison for adaptive  
 12 multiplicative sensitivity experiments (c) background error spread evolution for adaptive  
 13 multiplicative inflation experiments.

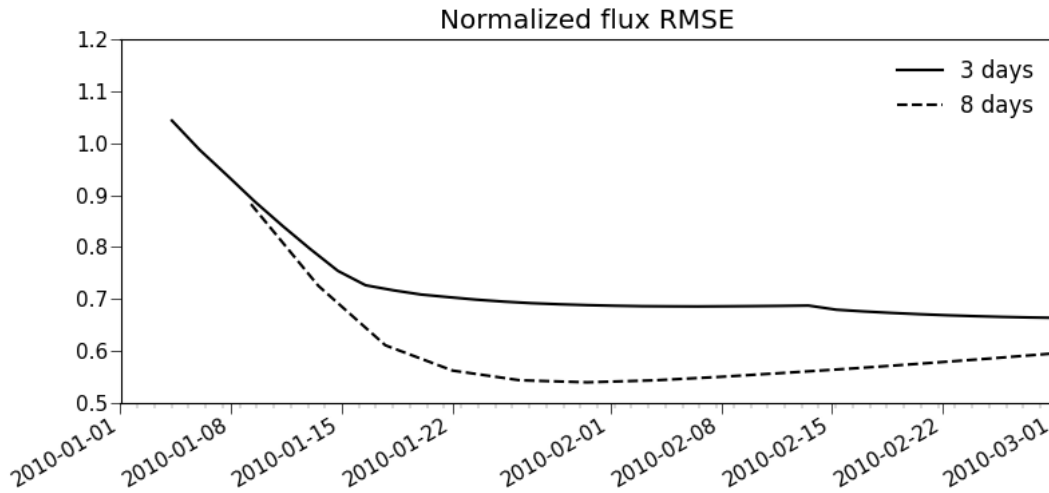

14

15 **Figure S4.** Time series of normalized RMSE estimated using 3 days and 8 days assimilation window  
 16 for CH<sub>4</sub> LETKF data assimilation (inflation method: RTPS).

17

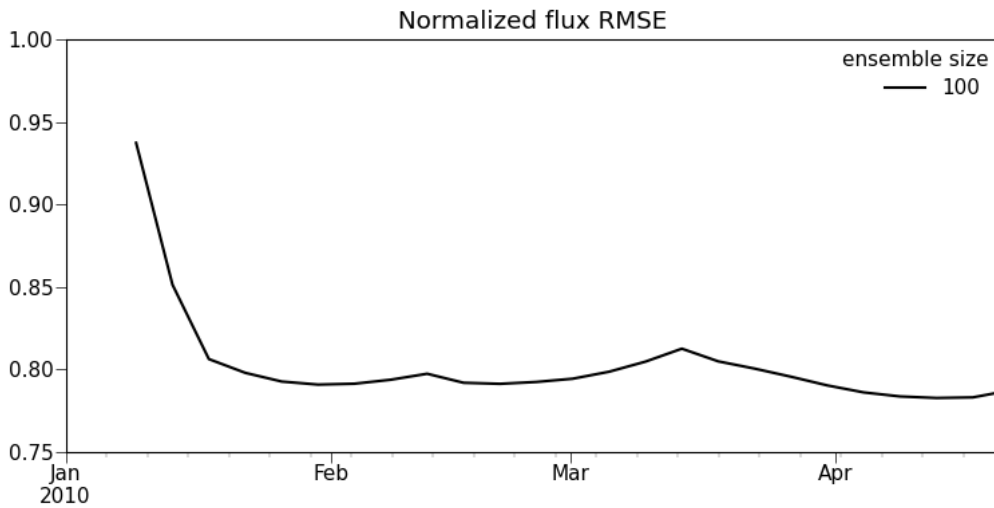

18

19

20 **Figure S5.** Time series of normalized RMSE of surface CH<sub>4</sub> flux analysis after assimilating GOSAT  
 21 synthetic CH<sub>4</sub> observations shown for the period of 4 months using initial spread that is generated by  
 22 considering the initial perturbation at each model grid by considering horizontal spatial error  
 23 correlation between grid points among ensemble members, with a global mean correlation of 20%.

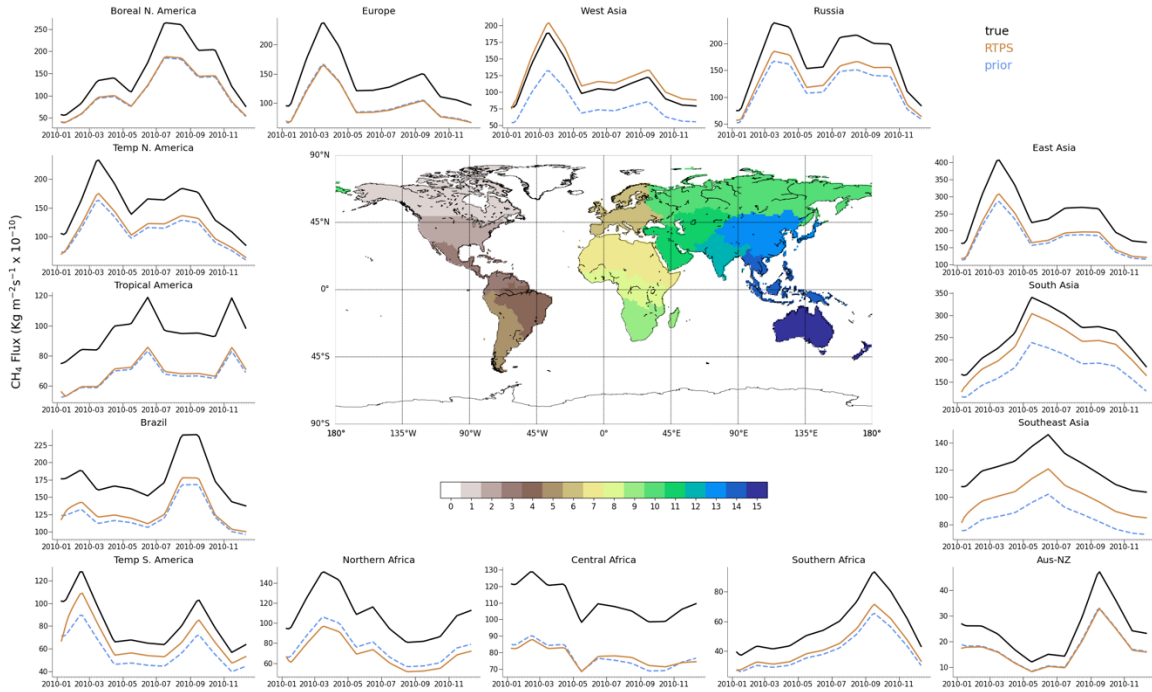

24

25 **Figure S6.** The 1-year CH<sub>4</sub> total flux seasonal cycles of true (black), prior (gray), and estimated from  
 26 the LETKF (blue) in 15 regions using FM inflation method after assimilating synthetic GOSAT CH<sub>4</sub>  
 27 observations (Fig. 6).

28

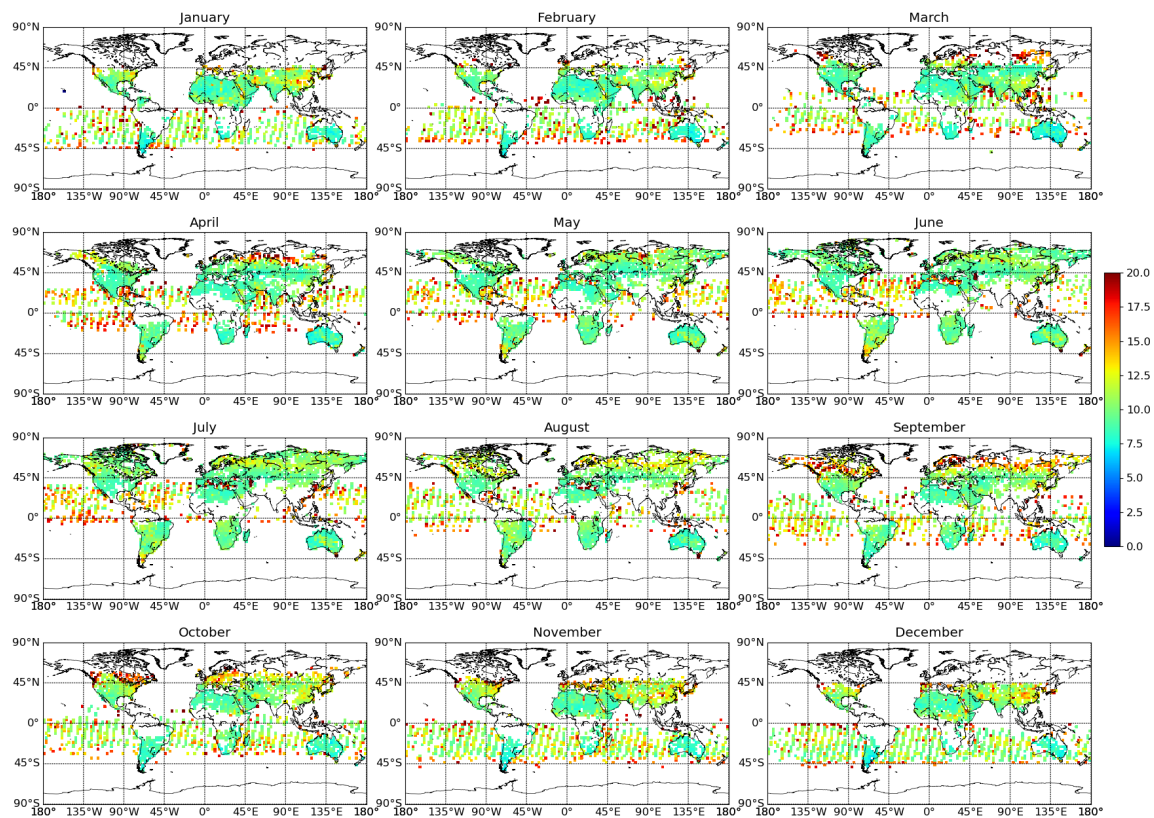

29

30 **Figure S7.** Monthly mean of real GOSAT observations retrieval error during the year 2010.

31
